# Supplementary material for: Emerging Genetic Tools to Investigate Molecular Pathways Related to Heat Stress in Chickens: A Review
Source: PubMed Central journal article supplement (PMC7823582; doi:10.3390/ani11010046), 2020-12-29
Supplement: animals-11-00046-s001.pdf [file animals-11-00046-s001.pdf]

| QTL_ID | Chromosome | Coord_A_bp | Coord_B_bp |
|--------|------------|------------|------------|
| 95395  | 1          | 70091023   | 70992158   |
| 95396  | 1          | 77003789   | 77992852   |
| 9112   | 2          | 0          | 100        |
| 30853  | 2          | 121250696  | 123202074  |
| 9114   | 3          | 0          | 100        |
| 9426   | 4          | 0          | 100        |
| 30862  | 5          | 51217211   | 51587365   |
| 9437   | 6          | 0          | 100        |
| 30875  | 11         | 10785873   | 11096350   |
| 95397  | 14         | 3006152    | 4999182    |
| 95401  | 14         | 3006152    | 3999663    |
| 95398  | 15         | 8001621    | 8993187    |
| 95399  | 15         | 8001621    | 9999305    |
| 9123   | 23         | 0          | 100        |
| 95400  | 26         | 153043     | 998907     |
| 95402  | 27         | 1058814    | 1999774    |

**Table S1.** All QTLs related to body temperature in chicken. Coord\_A\_bp = QTL starting point on a chromosome. Coord\_B\_bp = QTL ending point on a chromosome. All QTLs are significant.
